# Supplementary material for: Incorporating Genetic Heterogeneity in Whole-Genome Regressions Using Interactions
Source: PubMed Central journal article supplement (PMC4666286; doi:10.1007/s13253-015-0222-5), 2015-11-09
Supplement: 13253_2015_222_MOESM1_ESM.pdf [file 13253_2015_222_MOESM1_ESM.pdf]

## Supplementary Data

**Table S1.** Estimate Genomic Heritability derived from a Gaussian model (BRR, Pig data set).

| Trait | Analyses       |                |                |                   |                |                |                |                |                |
|-------|----------------|----------------|----------------|-------------------|----------------|----------------|----------------|----------------|----------------|
|       | Across groups  |                |                | Interaction model |                |                | Stratified     |                |                |
|       | G1             | G2             | G3             | G1                | G2             | G3             | G1             | G2             | G3             |
| T3    | .216<br>(.030) | .201<br>(.026) | .212<br>(.027) | .155<br>(.032)    | .125<br>(.022) | .211<br>(.028) | .297<br>(.054) | .215<br>(.040) | .323<br>(.042) |
| T4    | .388<br>(.033) | .375<br>(.028) | .361<br>(.027) | .386<br>(.043)    | .336<br>(.035) | .327<br>(.032) | .471<br>(.061) | .373<br>(.047) | .343<br>(.037) |
| T5    | .458<br>(.034) | .367<br>(.028) | .382<br>(.027) | .422<br>(.041)    | .345<br>(.036) | .352<br>(.031) | .468<br>(.049) | .358<br>(.053) | .344<br>(.038) |

G1, G2 and G3 identify groups 1, 2 and 3, respectively. Main and Int. refer to main effects and interaction effects, respectively.

**Table S2.** Estimate Genomic Heritability derived from a Gaussian model (BRR, Wheat data set).

| Trait | Analyses       |                |                   |                |                |                |
|-------|----------------|----------------|-------------------|----------------|----------------|----------------|
|       | Across groups  |                | Interaction model |                | Stratified     |                |
|       | G1             | G2             | G1                | G2             | G1             | G2             |
| T3    | .478<br>(.054) | .560<br>(.062) | .514<br>(.067)    | .643<br>(.067) | .497<br>(.074) | .640<br>(.071) |
| T4    | .432<br>(.057) | .509<br>(.064) | .486<br>(.062)    | .551<br>(.069) | .488<br>(.074) | .502<br>(.082) |
| T5    | .466<br>(.065) | .378<br>(.062) | .531<br>(.069)    | .473<br>(.078) | .525<br>(.079) | .477<br>(.087) |
| T4    | .436<br>(.061) | .460<br>(.069) | .497<br>(.066)    | .579<br>(.078) | .499<br>(.072) | .567<br>(.083) |

G1 and G2 identify groups 1 and 2, respectively. Main and Int. refer to main effects and interaction effects, respectively.

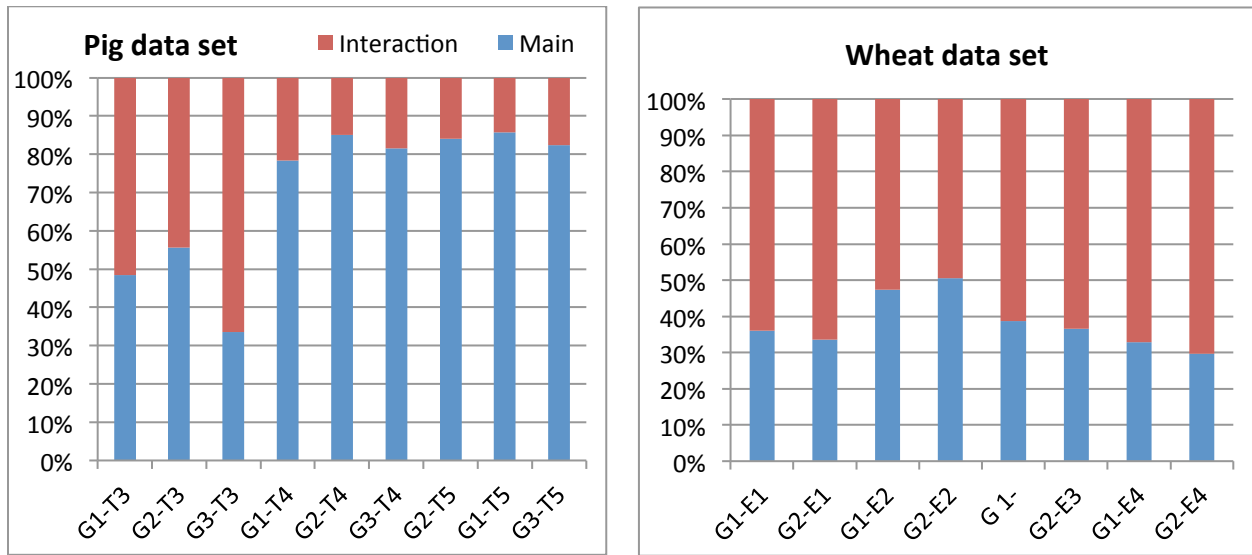

**Figure 4.** Proportion of the estimated genomic variance explained by the main and interaction terms by data set (pig data set in left panel, wheat data set in right panel), by group (G1-G3) and trait (T3-T5 in the pig data set)/environment (E1-E4, in the wheat data set).
